# Supplementary material
Source: publisher figshare collection journal article supplement (https://frontiersin.figshare.com/ndownloader/files/13267592)
Supplement: Supplementary file [file 13267592]

## Supplemental Figure 3

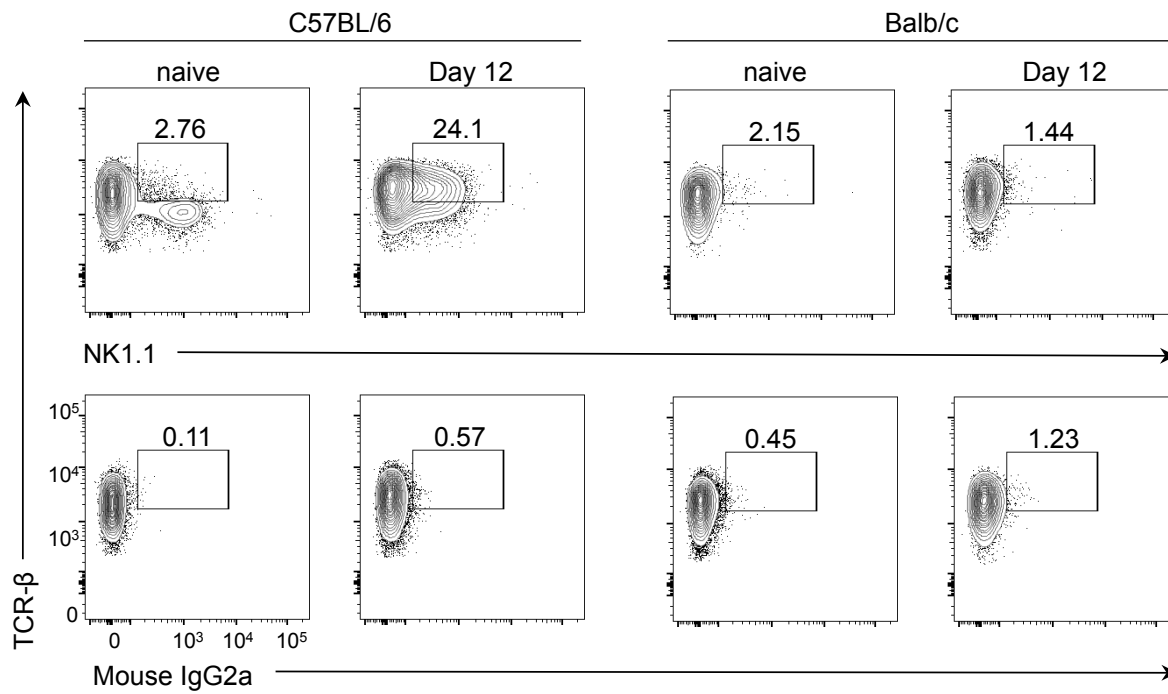

**Supplemental Figure 3.** Representative TCR $\beta$  and NK1.1 expression at day 12 post-infection in C57BL/6 and Balb/c mice. Mouse IgG2a, NK1.1-phycoerythrin isotype control. Data are representative of two independent experiments.
